# 1 Identification of gut microbiome markers for schizophrenia delineates a 2 potential role of *Streptococcus*

3 Feng Zhu<sup>1, \*</sup>, Yanmei Ju<sup>2,3,4,9, \*</sup>, Wei Wang<sup>5,6,7, \*</sup>, Qi Wang<sup>2,9, \*</sup>, Ruijin Guo<sup>2,3,4,8, \*</sup>,  
4 Qingyan Ma<sup>5,6,7</sup>, Qiang Sun<sup>2,10</sup>, Yajuan Fan<sup>5,6,7</sup>, Yuying Xie<sup>11</sup>, Zai Yang<sup>5,6,7</sup>, Zhuye  
5 Jie<sup>2,3,4</sup>, Binbin Zhao<sup>5,6,7</sup>, Liang Xiao<sup>2,3,12</sup>, Lin Yang<sup>5,6,7</sup>, Tao Zhang<sup>2,3,13</sup>, Junqin  
6 Feng<sup>5,6,7</sup>, Liyang Guo<sup>5,6,7</sup>, Xiaoyan He<sup>5,6,7</sup>, Yunchun Chen<sup>5,6,7</sup>, Ce Chen<sup>5,6,7</sup>, Chengge  
7 Gao<sup>5,6,7</sup>, Xun Xu<sup>2,3</sup>, Huanming Yang<sup>2,14</sup>, Jian Wang<sup>2,14</sup>, Yonghui Dang<sup>15</sup>, Lise  
8 Madsen<sup>2,16,17</sup>, Susanne Brix<sup>2,18</sup>, Karsten Kristiansen<sup>2,17†</sup>, Huijue Jia<sup>2,3,4,8†</sup>, Xiancang  
9 Ma<sup>†5,6,7</sup>

10

- 11 1. Center for Translational Medicine, The First Affiliated Hospital of Xi'an Jiaotong  
12 University, 277 Yanta West Road, Xi'an 710061, China.
- 13 2. BGI-Shenzhen, Shenzhen 518083, China.
- 14 3. China National Genebank, Shenzhen 518120, China.
- 15 4. Shenzhen Key Laboratory of Human Commensal Microorganisms and Health  
16 Research, BGI-Shenzhen, Shenzhen 518083, China.
- 17 5. Department of Psychiatry, The First Affiliated Hospital of Xi'an Jiaotong  
18 University, 277 Yanta West Road, Xi'an 710061, China.
- 19 6. Center for Brain Science, The First Affiliated Hospital of Xi'an Jiaotong  
20 University, 277 Yanta West Road, Xi'an 710061, China.
- 21 7. Clinical Research Center for Psychiatric Medicine of Shaanxi Province, The First  
22 Affiliated Hospital of Xi'an Jiaotong University, 277 Yanta West Road, Xi'an  
23 710061, China.
- 24 8. Macau University of Science and Technology, Taipa, Macau 999078, China.

- 25 9. BGI Education Center, University of Chinese Academy of Sciences, Shenzhen  
26 518083, China.
- 27 10. Department of Statistical Sciences, University of Toronto, Toronto, Canada.
- 28 11. Department of Statistics and Probability, Michigan State University, East  
29 Lansing, U.S.A.
- 30 12. Shenzhen Engineering Laboratory of Detection and Intervention of Human  
31 Intestinal Microbiome, BGI-Shenzhen, Shenzhen 518083, China.
- 32 13. Shenzhen Key Laboratory of Cognition and Gene Research, BGI-Shenzhen,  
33 Shenzhen 518083, China.
- 34 14. James D. Watson Institute of Genome Sciences, 310058 Hangzhou, China.
- 35 15. School of Forensic Medicine, Xi'an Jiaotong University, 76 Yanta West Road,  
36 Xi'an 710061, China.
- 37 16. Institute of Marine Research (IMR), P.O. Box 7800, 5020 Bergen, Norway.
- 38 17. Laboratory of Genomics and Molecular Biomedicine, Department of Biology,  
39 University of Copenhagen, Universitetsparken 13, 2100 Copenhagen, Denmark.
- 40 18. Department of Biotechnology and Biomedicine, Technical University of  
41 Denmark, 2800 Kgs. Lyngby, Denmark.

42  
43 \*These authors have contributed equally to this study

44 †Corresponding authors: X.M., [maxiancang@163.com](mailto:maxiancang@163.com) ; H.J., [jiahuijue@genomics.cn](mailto:jiahuijue@genomics.cn);  
45 K.K., [karsten@genomics.cn](mailto:karsten@genomics.cn) .

## 46    **Abstract**

47    Emerging evidence has linked the gut microbiota to schizophrenia. However, the  
 48    functional changes in the gut microbiota and the biological role of individual bacterial  
 49    species in schizophrenia have not been explored systematically. Here, we  
 50    characterized the gut microbiota in schizophrenia using shotgun metagenomic  
 51    sequencing of feces from a discovery cohort of 90 drug-free patients and 81 controls,  
 52    as well as a validation cohort of 45 patients taking antipsychotics and 45 controls. We  
 53    screened 83 schizophrenia-associated bacterial species and constructed a classifier  
 54    comprising 26 microbial biomarkers that distinguished patients from controls with a  
 55    0.896 area under the receiver operating characteristics curve (AUC) in the discovery  
 56    cohort and 0.765 AUC in the validation cohort. Our analysis of fecal metagenomes  
 57    revealed that schizophrenia-associated gut–brain modules included short-chain fatty  
 58    acids synthesis, tryptophan metabolism, and synthesis/degradation of  
 59    neurotransmitters including glutamate,  $\gamma$ -aminobutyric acid, and nitric oxide. The  
 60    schizophrenia-enriched gut bacterial species include several oral cavity-resident  
 61    microbes, such as *Streptococcus vestibularis*. We transplanted *Streptococcus*  
 62    *vestibularis* into the gut of the mice with antibiotic-induced microbiota depletion to  
 63    explore its functional role. We observed that this microbe transiently inhabited the  
 64    mouse gut and this was followed by hyperactivity and deficit in social behaviors,  
 65    accompanied with altered neurotransmitter levels in peripheral tissues. In conclusion,  
 66    our study identified 26 schizophrenia-associated bacterial species representing  
 67    potential microbial targets for future treatment, as well as gut–brain modules, some of  
 68    which may give rise to new microbial metabolites involved in the development of  
 69    schizophrenia.

## Introduction

Schizophrenia is a severe psychiatric disorder associated with hallucinations, delusions, and thought disorders perturbing perception and social interaction<sup>1</sup>. The etiology of schizophrenia is not elucidated, but assumed to be multifactorial involving genetic and environmental factors. Abnormalities of neurotransmitter systems have been extensively studied especially focusing on aberration of signaling involving dopamine, glutamate, and  $\gamma$ -aminobutyric acid (GABA)<sup>2-4</sup>. Increasing evidence indicates that schizophrenia may be a systemic disorder with neuropsychiatric conditions in addition to psychosis<sup>5</sup>. Furthermore, the importance of inflammation<sup>6</sup> and the involvement of the gastrointestinal system<sup>7</sup> in schizophrenia have received attention.

The gut microbiota is reported to play an important role in neurogenerative processes, and perturbation of the microbiota and microbial products have been demonstrated to affect behavior<sup>8-10</sup>. Changes in the gut microbiota have been associated with neurological<sup>11</sup> and neurodevelopmental disorders<sup>12,13</sup>, including schizophrenia<sup>14</sup>. It was recently reported that fecal transfer of the gut microbiota from patients with schizophrenia induces schizophrenia-associated behaviors in germ-free recipient mice accompanied with altered levels of glutamate, glutamine, and GABA in the hippocampus<sup>13</sup>. However, the identity and functionality of the specific bacteria responsible for mediating changes in the behavior of recipient mice are unknown<sup>15,16</sup>. Thus, the composition and functional capacity of the gut microbiota in relation to schizophrenia need to be systematically examined. Taxa and functional profiling of the microbiota composition is a premise for functional understanding of the gut microbiota<sup>17</sup>. Previous studies were based on 16S rRNA gene amplicon sequencing of relatively small cohorts<sup>14,18-20</sup> and hence failed to provide detailed functional profiling of the gut microbiota in schizophrenia. Metagenomic shotgun sequencing

96 combined with bioinformatics tools enables better characterization of the  
97 microbiota<sup>21</sup>, including a more accurate prediction of biological features of the  
98 microbes and their impacts on host physiology<sup>22</sup>.

99 Here, we carried out a metagenome-wide association study (MWAS) using  
100 171 samples (90 cases and 81 controls) and validated the results with an additional 90  
101 samples (45 cases and 45 controls). The functional changes within the schizophrenia  
102 gut microbiota were determined using pathway/module analysis based on the Kyoto  
103 Encyclopedia of Genes and Genomes (KEGG) and a recently developed gut-brain  
104 module (GBM) analysis of fecal metagenomes<sup>23</sup>. The functional roles of one  
105 particular schizophrenia-enriched gut bacterial species, *Streptococcus vestibularis*,  
106 were explored by transplanting this bacterium into the gut of the mice with antibiotic-  
107 induced microbiota depletion and observing its effects on animal behavior and brain  
108 neurochemicals.

109

## 110 **Results**

### 111 **The gut microbiota differs between schizophrenic patients and healthy controls**

112 We carried out shotgun sequencing on fecal samples from 90 drug-free patients and  
113 81 healthy controls (for demographic and clinical characteristics see Supplementary  
114 Table 1-3) and obtained an average of over 11 gigabases (Gb) sequence data per  
115 sample and mapped the high-quality reads onto a comprehensive reference gene  
116 catalogue of 11.4 million genes<sup>24</sup> (Supplementary Table 4).

117 The gut microbiota in schizophrenic patients showed greater  $\alpha$  diversity at the genus  
118 level ( $P = 0.027$ , Wilcoxon rank-sum test), higher  $\beta$  diversity at the genus level ( $P <$   
119  $0.001$ , Wilcoxon rank-sum test) and microbial gene level ( $P < 0.001$ , Wilcoxon rank-  
120 sum test) and comprised more genes compared with healthy controls (Supplementary

Fig. 1). Out of a total of 360 metagenomic operational taxonomic units (mOTUs)<sup>25</sup>, 83 mOTUs showed significant differences in relative abundance between patients and controls ( $P < 0.05$  and false discovery rate (FDR) = 0.136, Wilcoxon rank sum test and Storey's FDR method; Supplementary Table 5a). After adjusting for BMI, age, sex, and diet, these 83 mOTUs were still significant (Supplementary Table 5a). The gut microbiota in schizophrenic patients harbored many facultative anaerobes such as *Lactobacillus fermentum*, *Enterococcus faecium*, *Alkaliphilus oremlandii*, and *Cronobacter sakazakii/turicensis*, which are rare in a healthy gut. Additionally, bacteria that are often present in the oral cavity, such as *Veillonella atypica*, *Veillonella dispar*, *Bifidobacterium dentium*, *Dialister invisus*, *Lactobacillus oris*, and *Streptococcus salivarius* were more abundant in patients with schizophrenia than in healthy controls, indicating a close association between the oral and the gut microbiota in schizophrenia.

We then constructed a mOTU network to depict the co-occurrence correlation between the schizophrenia-associated gut bacteria (Fig. 1). Schizophrenia-enriched mOTUs (Wilcoxon rank-sum test) were more interconnected than control-enriched mOTUs (Spearman's correlation coefficient  $< -0.3$  or  $> 0.3$ ,  $P < 0.05$ ). The mOTU species from the genera *Streptococcus* and *Veillonella* showed positive cross-correlations. Moreover, the majority of the species in these two clusters of correlated mOTUs originated from the oral cavity, suggesting that orally resident bacteria in a synergistic manner may colonize the gut in schizophrenic patients (Fig. 1 and Supplementary Table 5a).

Functional modules and pathways enriched in the gut microbiota of patients relative to controls were analyzed using the KEGG database (Supplementary Table 6). The relative enrichment of 579 KEGG modules and 323 KEGG pathways varied

significantly between the two groups. Schizophrenia-depleted microbial functional modules included pectin degradation, lipopolysaccharide biosynthesis, autoinducer-2 (AI-2) transport system, glutamate/aspartate transport system, beta-carotene biosynthesis, whereas schizophrenia-enriched functional modules included methanogenesis, the gamma-aminobutyrate (GABA) shunt, and transport system of manganese, zinc, and iron (Supplementary Table 6).

## Neuroactive potential of schizophrenia-related bacterial species

We next compared the altered microbial neuroactive potential of the gut microbiota of schizophrenic patients with the controls at the species level using the method reported by Valles-Colomer et al.<sup>23</sup>. We mapped the metagenomic data of the 171 samples to a genome database including the 42 microbial species that were detected based on the 83 schizophrenia-associated mOTUs using PanPhlAn<sup>26</sup> and calculated the prevalence of species-level microbes. We then determined whether the abundance of 56 previously reported gut-brain modules (GBMs)<sup>23</sup>, present in each microbial species, varied significantly between schizophrenic patients and controls. The GBM set of each microbial species was obtained by cross-checking GBM-related genes and the species gene repertoires (Supplementary Table 7a). The frequency of the occurrence of each GBM within each species was compared between patients and controls using a Chi-squared test (Supplementary Table 7b). Schizophrenia-associated GBMs included short-chain fatty acid synthesis (acetate, propionate, butyrate, and isovaleric acid), tryptophan metabolism, and the synthesis of several neurotransmitters, such as glutamate, GABA, and nitric oxide (Fig. 2).

We chose to validate the presence of the GBM associated with tryptophan metabolism in schizophrenia, as tryptophan metabolism also is modulated by the gut microbiota and implicated in schizophrenia pathogenesis<sup>27,28</sup>. Hence, serum

171 tryptophan metabolites were measured in patients and controls and correlated with the  
172 presence of tryptophan modules in the gut microbiota. In agreement with the higher  
173 abundance of tryptophan metabolisms related GBMs, we observed lower serum  
174 tryptophan levels and higher kynurenic acid (KYNA) levels in schizophrenic  
175 patients (Supplementary Fig. 2a, c). Moreover, serum tryptophan levels were  
176 negatively correlated with the abundances of 38 bacterial species enriched in  
177 schizophrenic patients and positively correlated with six bacterial species enriched in  
178 controls (Supplementary Fig. 2d). Similarly, serum KYNA levels were positively  
179 correlated with 10 schizophrenia-enriched bacterial species and negatively correlated  
180 with 3 control-enriched bacterial species (Supplementary Fig. 2d). Thus, an altered  
181 gut microbiota may be associated with changes in serum levels of tryptophan and  
182 KYNA in schizophrenia.

### 183 **Microbial species-based biomarkers for schizophrenia**

184 To identify novel gut bacterial biomarkers and evaluate their diagnostic values for  
185 schizophrenia, we first constructed a set of random forest disease classifiers based on  
186 gut mOTUs. We performed a five-fold cross-validation procedure ten times on 90  
187 patients and 81 controls. Twenty six gut mOTUs reached the lowest classifier error in  
188 the random forest cross validation, and the ROC AUC score of the model was 0.896  
189 (Fig 3a, b). This microbial based classifier was not significantly influenced by age,  
190 gender, BMI, and diet style (Supplementary Table 8). This discriminatory model was  
191 validated on an additional validation cohort consisting 45 patients taking  
192 antipsychotics and 45 controls (Supplementary Table 9). The model still distinguished  
193 patients from controls with an ROC AUC score of 0.765. Among the 26 microbial  
194 biomarkers, 11 bacterial species with taxonomic identity were significantly enriched  
195 in schizophrenia, namely *Akkermansia muciniphila*, *Bacteroides plebeius*, *Veillonella*



196 *parvula*, *Clostridium symbiosum*, *Eubacterium siraeum*, *Cronobacter*  
 197 *sakazakii/turicensis*, *Streptococcus vestibularis*, *Alkaliphilus oremlandii*,  
 198 *Enterococcus faecium*, *Bifidobacterium longum*, and *Bifidobacterium adolescentis*.

199 Some of these microbial biomarkers were significantly associated with symptom  
 200 severity, cognitive performance, and diagnosis (Fig 3c). We next performed  
 201 metagenomic analysis on the fecal samples from 38 of the 90 patients after 3-months  
 202 of treatment (27 with risperidone and 11 with other antipsychotics, shown in  
 203 Supplementary Table 1). The psychotic symptoms and cognitive impairment  
 204 improved greatly along with treatment (Supplementary Fig. 3). However, only  
 205 approximately half of the microbial biomarkers returned to the levels in controls after  
 206 treatment (Fig. 3d). As the sample size of the follow-up patients was smaller, the  
 207 statistical significance threshold was increased from 0.05 to 0.1. Of the 26 identified  
 208 microbial biomarkers, 20 biomarkers remained significantly changed between 81  
 209 controls and 38 baseline patients ( $P < 0.1$ , FDR = 0.44, Benjamini and Hochberg  
 210 method, Fig. 3d). After 3-months of treatment, the abundances of 12 of these 26  
 211 biomarkers remained significantly changed compared with 81 controls ( $P < 0.1$ , FDR  
 212 = 0.33, Benjamini and Hochberg method, Supplementary Table 10). Pair-wise  
 213 comparison of all gut mOTUs for the treatment effect in the follow-up patients  
 214 revealed 48 differentially abundant bacterial species ( $P < 0.05$  and FDR = 0.420,  
 215 Paired Wilcoxon rank sum test; Benjamini and Hochberg method, Supplementary  
 216 Table 11). However, only 5 of the 48 differentially abundant species were included in  
 217 the 26 microbial biomarkers used for diagnosis. This result suggests that antipsychotic  
 218 treatment influences the gut microbiota, but does not completely restore the altered  
 219 microbiota associated with schizophrenia.

220

# 221 ***Streptococcus vestibularis* induced schizophrenia-like behaviors in mice**

222 *Streptococcus* (*S.*) *vestibularis* was identified as a diagnostic marker associated with  
 223 serum GABA, tryptophan, KYNA, and the Brief Assessment of Cognition in  
 224 Schizophrenia (BACS) scores in MATRICS Consensus Cognitive Battery (MCCB) test  
 225 (Fig. 3 and Supplementary Fig. 2). Moreover, *S. vestibularis*, present in the gut of a  
 226 number of schizophrenic patients, was predicted to have GBMs related to glutamate  
 227 synthesis, GABA degradation, and Isovaleric acid synthesis I (Fig. 2). As some  
 228 pathogenic species of *Streptococcus* are known to enter the brain<sup>29</sup>, and have been  
 229 implicated in pediatric acute-onset neuropsychiatric syndrome<sup>30,31</sup>, we asked if *S.*  
 230 *vestibularis* might play a role in the pathophysiology of schizophrenia. Hence, we  
 231 transplanted *S. vestibularis* ATCC 49124, using oral gavage and drinking water, into  
 232 C57BL/6 mice after antibiotics-based microbiota depletion (Supplementary Fig. 4).  
 233 Another strain of streptococcus, *S. thermophilus* ST12, which is widely present in the  
 234 human gut, was used as a bacterial control. Behavioral tests were performed to  
 235 evaluate the effect of *S. vestibularis* transplantation (Fig. 4a). Quantitative polymerase  
 236 chain reaction (q-PCR) used to quantify the 16S rRNA gene of *S. vestibularis* and *S.*  
 237 *thermophilus*, revealed that their concentration increased by 4,164- and 6,183-fold  
 238 immediately after transplantation and remained at a 31.2- and 58.1-fold increase after  
 239 the behavioral tests as compared to the control mice (Supplementary Fig. 5).  
 240 Compared to control mice gavaged with buffer or with *S. thermophilus*, the *S.*  
 241 *vestibularis*-treated mice had increased their total distance traveled and times of  
 242 rearing during a 30-minute open-field test (Fig. 4b in this figure, it is better to put *S.*  
 243 *thermophilus* next to control since *S. thermophilus* is also a control, d). They  
 244 continued their hyperlocomotion after the 10-minute habituation period and showed  
 245 no obvious decline in locomotion activity after a period of 30-minutes (Fig. 4c). In the

three-chamber social test, the *S. vestibularis* mice displayed obvious deficits in sociability and social novelty, as they were much less sociable and avoided social novelty (Fig. 4e-g). However, in Barnes maze, elevated plus maze, and tail suspension test, the mice transplanted with *S. vestibularis* displayed spatial memory function, depressive state, and anxiety levels similar to either saline or *S. thermophilus*-treated mice (Supplementary Fig. 6). There were no significant changes in body weight, systemic pro-inflammatory cytokines, and endotoxin, and HPA axis hormones among the *S. vestibularis*-treated, *S. thermophilus*-treated, and control mice (Supplementary Fig. 7 a-i).

We then compared the transcriptome and neurotransmitter levels between *S. vestibularis*-treated and saline-treated mice in their peripheral tissues and brain. *S. vestibularis* treated mice had significantly lower levels of dopamine in serum, intestinal contents, and colonic tissue, as well as decreased GABA levels in the intestinal contents immediately after the transplantation, but these effects disappeared after 10 days of post-transplantation (Supplementary Fig. 8b, e, h, and f). Intestinal contents of *S. vestibularis*-treated mice showed increased levels of 5-HT throughout the behavioral tests (Supplementary Fig. 8d). *S. vestibularis* transplantation did not induce obvious inflammatory cell infiltration (Supplementary Fig. 6j) but induced changes in the expression of numerous immune/inflammation-related genes in the intestine when compared with saline gavage (Supplementary Table 12 a-b). By gene enrichment analysis, we found these genes were enriched in cytokine-cytokine receptor interaction, chemokine signaling pathway, leukocyte trans-endothelial migration, complement and coagulation cascades, antigen processing and presentation, intestinal immune network for IgA production, and inflammatory bowel disease (Supplementary Fig. 9a-b). These results suggested that *S. vestibularis* may

influence gut immune homeostasis. In the brain, the levels of neurotransmitters were not affected by transplantation with *S. vestibularis* and only tryptophan decreased in the prefrontal cortex of *S. vestibularis*-treated mice (Supplementary Table 13). However there are 354, 540, and 470 significantly differentially expressed gene in the PFC, striatum, and hippocampus between *S. vestibularis*-treated and saline treated mice (Supplementary Table 12 c-d). The pathways influenced by these differentially expressed genes included defense responses and immune-regulating pathways like in the gut, as well as peroxisome proliferator-activated receptor signaling pathway, steroid biosynthesis, tyrosine, and tryptophan metabolism (Supplementary Fig. 9c-e).

## Discussion

We here used a combination of MWAS and a functional-based approach to systematically screen for schizophrenia-associated gut microbes and identified a number of schizophrenia-associated GBMs, expanding our insight into functional changes characterizing the gut microbiota of schizophrenic patients. Consistent with the MWAS results and the inferred microbial functions, the schizophrenia-associated bacterium *Streptococcus vestibularis* was shown in mice to have a functional neuroactive potential<sup>23</sup> associated with changes in animal behaviors.

Poor reproducibility is common in microbiome research<sup>32</sup>. In the present study, a diagnostic model of 26 microbial biomarkers obtained using a discovery cohort, which included drug-free patients, was well validated in a testing cohort, which included patients taking antipsychotics. We chose to investigate drug-free patients in the discovery set in order to eliminate the possible effects of antipsychotics on the gut microbiota and identify gut bacteria possibly involved in the development of schizophrenia. The validation of the initial findings in patients taking antipsychotics demonstrated that these microbial markers are, to a certain extent, independent of

antipsychotics. Follow-up analysis also revealed that 20 of the 26 identified microbial biomarkers in the diagnostic model remained the same over a treatment duration of three months. Therefore, most microbial biomarkers for schizophrenia seem stable and are not sensitive to current antipsychotics.

Analysis of the bacterial V3-V4 region of 16S rRNA regions has a limited resolution in terms of identification of bacterial species<sup>17,25,33</sup>. Current 16S rRNA gene amplicon sequencing generally capture reliable taxonomic classification at the genus level<sup>33</sup>. However, several recent analyses indicate that many taxonomic associations might be presented only at levels subordinate to species<sup>17,34,35</sup>. Accordingly, most of the schizophrenia-associated microbial species revealed by the MWAS results were not identified in previous studies by using 16S rRNA gene sequencing<sup>14,18,36</sup>. There are more overlaps of findings at genus level between our findings and the previous studies (Supplementary Table 5b), including 6 in the study of Zheng et al. (*Acidaminococcus*, *Akkermansia*, *Alistipes*, *Citrobacter*, *Dialister*, *Veillonella*)<sup>14</sup>, 1 in the study of Schwarz et al. (*Lactobacillus*)<sup>36</sup>, 1 in the study of Shen et al. (*Methanobrevibacter*)<sup>18</sup>. Surprisingly, gut microbiota diversities based on genus level taxonomy and annotated genes were higher in schizophrenic patients compared to controls. In accordance with our data, both  $\alpha$  diversity and  $\beta$  diversity showed an increase in the blood microbiota of schizophrenic patients<sup>37</sup>. The microbes in blood are thought to originate from the gut as well as from the oral cavities<sup>38,39</sup>. Moreover, the increased diversity of the blood microbiota may be due to the nonspecific overall increased microbial burden in schizophrenia<sup>37</sup>, which is supported by our observed increased microbial gene number in patients' gut. The considerable heterogeneity of the etiology and clinical manifestation of schizophrenia<sup>40,41</sup> may be implicated in such an increase in the microbiota diversity. Another notable feature of the gut microbiota

321 in schizophrenia is the significant enrichment of oral cavity resident bacteria.  
 322 Increased bacterial translocation due to a leaky gut and innate immune imbalance are  
 323 both presented in patients with schizophrenia<sup>42,43</sup>. Furthermore, gastrointestinal  
 324 inflammation due to a dysfunctional immune response to pathogen infection and food  
 325 antigens is also prevalent in schizophrenia<sup>44,45</sup>. These intestinal pathological  
 326 conditions may disrupt the mucosal barrier and decrease immune surveillance towards  
 327 foreign microbes<sup>7</sup>, increasing the possibility of observing oral bacteria in the gut.

328 The composition of human gut microbiota is linked to schizophrenia<sup>14,18,36</sup>, but  
 329 knowledge of individual microbial species is needed to decipher their biological  
 330 role<sup>46</sup>. We still do not completely understand the functions of most of the  
 331 schizophrenia-associated microbes identified here in the gut or their biological roles  
 332 in schizophrenia. Intriguingly, some schizophrenia-enriched bacterial species in the  
 333 present study are also over-presented in subjects with metabolic disorders and  
 334 atherosclerotic cardiovascular diseases<sup>47-50</sup>. Schizophrenic patients are more likely to  
 335 develop obesity, hyperglycemia/diabetes, hypertension, and cardiovascular disease.  
 336 Additionally, some of these risks are independent of the effects of antipsychotic  
 337 administration and healthy lifestyle choices<sup>51-54</sup>. Several prenatal and early-life risk  
 338 factors are shared by schizophrenia, metabolic disorders, and cardiovascular diseases  
 339 such as prenatal famine, postnatal growth restriction, the quality of fetal growth, and  
 340 low birth weight<sup>55-61</sup>. Gut microbes enriched in both schizophrenia and metabolic  
 341 disorders/cardiovascular disease may account for the increased risk of these  
 342 comorbidities in schizophrenia. Moreover, new evidence also indicates that metabolic  
 343 disorders in schizophrenia are not only comorbidities, but also affect pathogenesis,  
 344 such as the manifestation of negative symptoms<sup>62</sup>, cognitive function<sup>63</sup>, and brain  
 345 white matter disruption<sup>64</sup>. Treating metabolic disorders via physical activity and

346 psychosocial and dietary interventions, is also an effective approach to improve the  
347 symptoms of schizophrenia<sup>63</sup>. Therefore, manipulation of gut microbes may have  
348 double therapeutic potential for both metabolic disorders and schizophrenia.

349 Identifying the mediators of gut–brain microbiota communication affected by  
350 specific microbial metabolites is a key step to elucidate the mechanism behind the  
351 regulation of the host’s behaviors and psychology by gut microbial species. A recently  
352 published database of manually curated GBMs provides a powerful tool for functional  
353 interpretation of metagenomes in a microbiota–gut–brain context<sup>23</sup>. Using this  
354 database, we identified 27 schizophrenia-associated GBMs, which give clues about  
355 how the gut microbiota might modulate the pathophysiology of schizophrenia. Among  
356 these GBMs, a few well-known molecular entities associated with schizophrenia were  
357 covered, such as several kinds of neurotransmitters<sup>2-4</sup> and tryptophan metabolites<sup>65,66</sup>.  
358 Furthermore, some microbes presenting these GBMs were significantly associated  
359 with the serum levels of several neurotransmitters and tryptophan metabolites.  
360 Parallel to the present study, our previous animal study demonstrated that  
361 transplantation of fecal microbiota from drug-free patients with schizophrenia into  
362 specific pathogen-free mice could cause schizophrenia-like behavioral abnormalities  
363 and dysregulated kynurenine metabolism<sup>67</sup>. The consistent findings of altered  
364 tryptophan-kynurenine metabolism revealed by human serum metabolite analysis,  
365 microbiota-based GBM prediction, and mouse studies suggest that this pathway is an  
366 important link between schizophrenia and gut microbiota dysbiosis. Of note,  
367 transplantation of one bacteria, *S. vestibularis* ATCC 49124, possessing a GBM  
368 involved in GABA degradation induced abnormal behaviors in the recipient mice.  
369 Importantly, the level of GABA in intestinal content of *S. vestibularis*-treated mice  
370 significantly decreased compared with saline-treated mice, which is in accordance

371 with the inferred GBM and GABA degradation. The schizophrenia-enriched *S.*  
372 *vestibularis* contributed to the expression of two types of schizophrenia-relevant  
373 behaviors (hyperactivity and impaired social behaviors) in mice. To the best of our  
374 knowledge, this is the first study which aims to determine the functional roles of a  
375 single bacterium associated with schizophrenia in disease pathogenesis. Although the  
376 biological mechanisms underlying the effects of *S. vestibularis* are still unclear, our  
377 data indicate profound influences of this microbe on brain neurotransmitters. In  
378 conclusion, our study identified a number of schizophrenia-associated bacterial  
379 species representing potential microbial targets for future treatment and GBMs of  
380 which some may support the synthesis of new microbial metabolites of importance for  
381 the development of schizophrenia

382



## 383     **Acknowledgements**

384     This study was supported by the Clinical Research Award of the First Affiliated  
385     Hospital of Xi'an Jiaotong University (No. XJTU1AF-CRF-2016-005), Shenzhen  
386     Municipal Government of China (No. JCYJ20170817145523036 and DRC-SZ  
387     [2015]162), Innovation Team Project of Natural Science Fund of Shanxi Province  
388     (2017KCT-20), and Key Program of Natural Science Fund of Shanxi Province  
389     (2018ZDXD-SF-036).

390

391

## 392     **Author contribution**

393     X. M., H. J., R. G., F. Z., and Z. J. conceived the study. F. Z., Z. Y., F. Z., L. Y., B. Z.,  
394     and Q.M. performed mice experiments. W. W., Q. M., Y. F., L. G., Y. D., Y. C., C. C.,  
395     C. G., and X.M. recruited volunteers and collected samples for the study. W. W., Q.  
396     M., Y. F., Z. Y., L. Y., and F. Z. collected the human fecal and blood samples. Z. Y., L.  
397     Y, and F. Z. analyzed the human serum. R. G.,Y. J., Q. W., Q. S., Y. X, and B. L.  
398     performed bioinformatics analyses. K. K., S. B., L. M, and B. L. advised on the mice  
399     experiments. F. Z., R. G.,H. J., Y. J., and Q. W. interpreted the results and wrote the  
400     manuscript with extensive revision performed by L.M., S.B., K.K and Y.X. All  
401     authors contributed to the final revision of the manuscript.

402

## 403     **Competing interests**

404     Authors declare no competing interests.

405

## 406     **Data availability**

407     Metagenomic sequencing data for all samples have been deposited in the European  
408     Nucleotide Archive (ENA) database under accession identification code ERP111403.

409

## 410 **Figure captions**

### 411 **Figure 1. Network of mOTUs differentially enriched in healthy controls and** 412 **schizophrenic patients.**

413 Node sizes reflect the mean abundance of mOTUs. mOTUs annotated to species are colored  
414 according to family (Red edges, Spearman's rank correlation coefficient  $> 0.3$ ,  $P < 0.05$ ; blue  
415 edges, Spearman's rank correlation coefficient  $< -0.3$ ,  $P < 0.05$ ).

### 416 **Figure 2. The gut-brain modules present in schizophrenia-associated bacterial species.**

417 A green dot indicates a statistically significant association between a gut-brain modules  
418 present in schizophrenia-associated bacterial species and a metabolite. No dot represents a  
419 non-significant association or a non-existent association. The difference in relation to  
420 presence between schizophrenic patients and healthy controls was calculated (Chi-square test,  
421  $P < 0.05$ ). The bar plot shows the frequency of each bacterial species present in schizophrenic  
422 patients (SCZ, blue bar) and healthy controls (HC red bar), respectively.

### 423 **Figure 3. Gut microbiome-based discrimination between schizophrenic patients and** 424 **healthy controls.**

425 (a) Receiver operating curves (ROC) according to 171 samples of the discovery set (green  
426 line) and 90 independent validation samples (pink line) calculated by cross-validated random  
427 forest models. Area under ROC (AUCs) and the 95% confidence intervals (in parentheses) are  
428 also shown. (b) The 26 mOTUs with most weight to discriminate schizophrenic (SCZ)  
429 patients and healthy controls (HC) were selected by the cross-validated random forest models.  
430 The length of line indicates the contribution of the biomarkers to the discriminative model.  
431 The color of each mOTU indicates its enrichment in schizophrenic patients (blue) or healthy  
432 controls (purple) or no significant direction (black), respectively. (c) Spearman's correlation  
433 of 26 mOTUs classifiers with three types of neurotransmitter in serum (green), seven types of  
434 cognitive function evaluated using the MATRICS Consensus Cognitive Battery (purple), and

435 with the positive score and the negative score of the positive and negative syndrome scale  
436 (blue). Only significant associations are displayed with correlation coefficient ( $P$  value <  
437 0.05). (d). The relative abundance ( $\log_{10}$ ) of 26 mOTU classifiers in 90 HCs and 38 SCZ  
438 patients at baseline and on a follow-up (3 months later). GABA: 4-aminobutyric acid; TMT:  
439 Trail Making Test; BACS SC: Brief Assessment of Cognition in Schizophrenia; Fluency:  
440 Category Fluency in Animal Naming; WMS-III: Wechsler Memory Scale-Third Edition for  
441 working memory; HVLt-R: Hopkins Verbal Learning Test-Revised for visual learning; NAB:  
442 Neuropsychological Assessment Battery for reasoning and problem solving; MSCEIT: Mayer-  
443 Salovey-Caruso Emotional Intelligence Test for social cognition.

444 **Figure 4. *Streptococcus vestibularis* induces hyperkinetic behavior and impaired social**  
445 **interaction in mice.**

446 (a) Schematic diagram of bacterial transplantation and behavioral test. The gut microbiota of  
447 mice was depleted by antibiotics, and then *Streptococcus vestibularis*, *Streptococcus*  
448 *thermophilus*, or their storage buffer (saline) was administered via oral gavage and drinking  
449 water. A series of behavioral tests were carried out after administration of bacteria. The data  
450 are representative of two independent experiments. Open field test (OFT), three-chamber  
451 social test (TCST), elevated plus maze (EPM), Barnes maze (BM), and the tail suspension test  
452 (TST) (for a detailed description, please consult Supplementary Figure 6). (b) The cumulative  
453 distance (meters) in different zones in 30-minute OFT in the three groups of mice (in  
454 periphery:  $F_{(2,46)} = 11.12$ ,  $P = 0.0001$ ; in center:  $F_{(2,46)} = 9.221$ ,  $P = 0.0004$ ; total distance:  $F_{(2,46)}$   
455  $= 13.69$ ,  $P < 0.0001$ ). (c) the cumulative distance (meters) in every 10-minute time interval of  
456 OFT traveled by *Streptococcus vestibularis*-treated mice compared to that traveled by  
457 *Streptococcus thermophilus*-treated mice and control mice. Time effect:  $F_{(2,92)} = 9.816$ ,  $P =$   
458  $0.0001$ ; group effect:  $F_{(2,46)} = 13.69$ ,  $P < 0.0001$ ; time  $\times$  group effect:  $F_{(4,92)} = 1.808$ ,  $P = 0.134$ .  
459 (d) The number of rearing in *Streptococcus vestibularis*-treated mice compared with  
460 *Streptococcus thermophilus*-treated mice and saline-treated mice during a 30-minute OFT ( $P$   
461  $= 0.017$ ). (e-g) TCST comparing sociability of *Streptococcus vestibularis*-treated mice to that

of *Streptococcus thermophilus*-treated mice and control mice. The results show that *Streptococcus thermophilus*-treated mice and saline-treated mice display obvious sociability, i.e. demonstrate an increase in the number of times of probing a mouse (e,  $P < 0.0001$ ) and spend longer time interacting with a mouse (f,  $P = 0.002$ ) compared to an empty cage, and obvious social novelty, i.e. spend longer time interacting with an unacquainted mouse (new mouse; g,  $P = 0.005$ ,  $DF = 90$ ,  $t = 4.277$ ) in comparison with an acquainted mouse. However, these types of social behaviors were not observed in *Streptococcus vestibularis*-treated mice (for sociability : e,  $P = 0.881$ ,  $DF = 90$ ,  $t = 0.665$ ; f,  $P = 0.282$ ,  $DF = 90$ ,  $t = 1.639$ ; for social novelty, g,  $P = 0.923$ ;  $DF = 90$ ,  $t = 0.564$ ). Data are presented as Means  $\pm$  SEM ( $n = 15 \sim 6$  per group). The circle represents one value from individual mice (b and c).  $P$  values were determined one-way analysis of variance (ANOVA) (b), repeated measure two-way ANOVA followed by Sidak's multiple comparisons test (c), Kruskal-Wallis test followed by Dunn's multiple comparisons test (d), or two-way (ANOVA) followed by Sidak's multiple comparisons test (e to g). Blue  $P$  value indicates the comparison between the *Streptococcus vestibularis*-treated and the saline-treated mice and green  $P$  value indicates the comparison between *Streptococcus thermophilus*-treated and saline-treated mice (b, c).

478

479

480

## 481 References

- 482 1. van Os, J. & Kapur, S. Schizophrenia. *Lancet* **374**, 635-645 (2009).
- 483 2. Kesby, J.P., Eyles, D.W., McGrath, J.J. & Scott, J.G. Dopamine, psychosis and schizophrenia: the widening gap between basic and clinical neuroscience. *Translational psychiatry* **8**, 30 (2018).
- 484 3. Hoftman, G.D., et al. Altered Gradients of Glutamate and Gamma-Aminobutyric Acid
- 485 Transcripts in the Cortical Visuospatial Working Memory Network in Schizophrenia. *Biol Psychiatry* **83**, 670-679 (2018).
- 486 4. Rowland, L.M., et al. Frontal Glutamate and gamma-Aminobutyric Acid Levels and Their
- 487 Associations With Mismatch Negativity and Digit Sequencing Task Performance in
- 488 Schizophrenia. *JAMA Psychiatry* **73**, 166-174 (2016).
- 489 5. Kirkpatrick, B., Miller, B., Garcia-Rizo, C. & Fernandez-Egea, E. Schizophrenia: a systemic
- 490 disorder. *Clin Schizophr Relat Psychoses* **8**, 73-79 (2014).
- 491
- 492

- 493 6. Khandaker, G.M., *et al.* Inflammation and immunity in schizophrenia: implications for  
494 pathophysiology and treatment. *Lancet Psychiatry* **2**, 258-270 (2015).
- 495 7. Severance, E.G., Prandovszky, E., Castiglione, J. & Yolken, R.H. Gastroenterology issues in  
496 schizophrenia: why the gut matters. *Curr Psychiatry Rep* **17**, 27 (2015).
- 497 8. Kang, D.W., *et al.* Microbiota Transfer Therapy alters gut ecosystem and improves  
498 gastrointestinal and autism symptoms: an open-label study. *Microbiome* **5**, 10 (2017).
- 499 9. Zheng, P., *et al.* Gut microbiome remodeling induces depressive-like behaviors through a  
500 pathway mediated by the host's metabolism. *Molecular psychiatry* **21**, 786-796 (2016).
- 501 10. De Palma, G., *et al.* Microbiota and host determinants of behavioural phenotype in  
502 maternally separated mice. *Nature communications* **6**, 7735 (2015).
- 503 11. Sampson, T.R., *et al.* Gut Microbiota Regulate Motor Deficits and Neuroinflammation in a  
504 Model of Parkinson's Disease. *Cell* **167**, 1469-1480 e1412 (2016).
- 505 12. Hsiao, E.Y., *et al.* Microbiota modulate behavioral and physiological abnormalities associated  
506 with neurodevelopmental disorders. *Cell* **155**, 1451-1463 (2013).
- 507 13. Buffington, S.A., *et al.* Microbial Reconstitution Reverses Maternal Diet-Induced Social and  
508 Synaptic Deficits in Offspring. *Cell* **165**, 1762-1775 (2016).
- 509 14. Zheng, P., *et al.* The gut microbiome from patients with schizophrenia modulates the  
510 glutamate-glutamine-GABA cycle and schizophrenia-relevant behaviors in mice. *Sci Adv* **5**,  
511 eaau8317 (2019).
- 512 15. Dinan, T.G., Borre, Y.E. & Cryan, J.F. Genomics of schizophrenia: time to consider the gut  
513 microbiome? *Molecular psychiatry* **19**, 1252-1257 (2014).
- 514 16. Nguyen, T.T., Kosciolk, T., Eyler, L.T., Knight, R. & Jeste, D.V. Overview and systematic review  
515 of studies of microbiome in schizophrenia and bipolar disorder. *J Psychiatr Res* **99**, 50-61  
516 (2018).
- 517 17. Schmidt, T.S.B., Raes, J. & Bork, P. The Human Gut Microbiome: From Association to  
518 Modulation. *Cell* **172**, 1198-1215 (2018).
- 519 18. Shen, Y., *et al.* Analysis of gut microbiota diversity and auxiliary diagnosis as a biomarker in  
520 patients with schizophrenia: A cross-sectional study. *Schizophr Res* (2018).
- 521 19. Nguyen, T.T., *et al.* Differences in gut microbiome composition between persons with chronic  
522 schizophrenia and healthy comparison subjects. *Schizophrenia research* (2018).
- 523 20. Flowers, S.A., *et al.* Effects of Atypical Antipsychotic Treatment and Resistant Starch  
524 Supplementation on Gut Microbiome Composition in a Cohort of Patients with Bipolar  
525 Disorder or Schizophrenia. *Pharmacotherapy* **39**, 161-170 (2019).
- 526 21. Weinstock, G.M. Genomic approaches to studying the human microbiota. *Nature* **489**, 250-  
527 256 (2012).
- 528 22. Gibbons, S.M. Microbial community ecology: Function over phylogeny. *Nat Ecol Evol* **1**, 32  
529 (2017).
- 530 23. Valles-Colomer, M., *et al.* The neuroactive potential of the human gut microbiota in quality of  
531 life and depression. *Nat Microbiol* **4**, 623-632 (2019).
- 532 24. Xie, H., *et al.* Shotgun Metagenomics of 250 Adult Twins Reveals Genetic and Environmental  
533 Impacts on the Gut Microbiome. *Cell Syst* (2016).
- 534 25. Sunagawa, S., *et al.* Metagenomic species profiling using universal phylogenetic marker  
535 genes. *Nat Methods* **10**, 1196-1199 (2013).
- 536 26. Scholz, M., *et al.* Strain-level microbial epidemiology and population genomics from shotgun  
537 metagenomics. *Nat Methods* **13**, 435-438 (2016).
- 538 27. Plitman, E., *et al.* Kynurenic Acid in Schizophrenia: A Systematic Review and Meta-analysis.  
539 *Schizophrenia bulletin* **43**, 764-777 (2017).
- 540 28. Erhardt, S., Schwieler, L., Imbeault, S. & Engberg, G. The kynurenine pathway in schizophrenia  
541 and bipolar disorder. *Neuropharmacology* **112**, 297-306 (2017).
- 542 29. Coureuil, M., Lecuyer, H., Bourdoulous, S. & Nassif, X. A journey into the brain: insight into  
543 how bacterial pathogens cross blood-brain barriers. *Nat Rev Microbiol* **15**, 149-159 (2017).
- 544 30. Orefici, G., Cardona, F., Cox, C.J. & Cunningham, M.W. Pediatric Autoimmune  
545 Neuropsychiatric Disorders Associated with Streptococcal Infections (PANDAS). in  
546 *Streptococcus pyogenes : Basic Biology to Clinical Manifestations* (eds. Ferretti, J.J., Stevens,  
547 D.L. & Fischetti, V.A.) (Oklahoma City (OK), 2016).
- 548 31. Orlovsk, S., *et al.* Association of Streptococcal Throat Infection With Mental Disorders:  
549 Testing Key Aspects of the PANDAS Hypothesis in a Nationwide Study. *JAMA Psychiatry* **74**,

- 740-746 (2017).
32. Schloss, P.D. Identifying and Overcoming Threats to Reproducibility, Replicability, Robustness, and Generalizability in Microbiome Research. *MBio* **9**(2018).
33. Matias Rodrigues, J.F., Schmidt, T.S.B., Tackmann, J. & von Mering, C. MAPseq: highly efficient k-mer search with confidence estimates, for rRNA sequence analysis. *Bioinformatics* **33**, 3808-3810 (2017).
34. Lloyd-Price, J., *et al.* Strains, functions and dynamics in the expanded Human Microbiome Project. *Nature* **550**, 61-66 (2017).
35. Costea, P.I., *et al.* Subspecies in the global human gut microbiome. *Mol Syst Biol* **13**, 960 (2017).
36. Schwarz, E., *et al.* Analysis of microbiota in first episode psychosis identifies preliminary associations with symptom severity and treatment response. *Schizophrenia research* **192**, 398-403 (2018).
37. Olde Loohuis, L.M., *et al.* Transcriptome analysis in whole blood reveals increased microbial diversity in schizophrenia. *Translational psychiatry* **8**, 96 (2018).
38. Potgieter, M., Bester, J., Kell, D.B. & Pretorius, E. The dormant blood microbiome in chronic, inflammatory diseases. *FEMS Microbiol Rev* **39**, 567-591 (2015).
39. Spadoni, I., *et al.* A gut-vascular barrier controls the systemic dissemination of bacteria. *Science* **350**, 830-834 (2015).
40. Weinberg, D., *et al.* Cognitive Subtypes of Schizophrenia Characterized by Differential Brain Volumetric Reductions and Cognitive Decline. *JAMA Psychiatry* **73**, 1251-1259 (2016).
41. Malhotra, A.K. Dissecting the Heterogeneity of Treatment Response in First-Episode Schizophrenia. *Schizophrenia bulletin* **41**, 1224-1226 (2015).
42. Severance, E.G., *et al.* Discordant patterns of bacterial translocation markers and implications for innate immune imbalances in schizophrenia. *Schizophrenia research* **148**, 130-137 (2013).
43. Maes, M., Sirivichayakul, S., Kanchanatawan, B. & Vojdani, A. Upregulation of the Intestinal Paracellular Pathway with Breakdown of Tight and Adherens Junctions in Deficit Schizophrenia. *Mol Neurobiol* (2019).
44. Severance, E.G., *et al.* Gastrointestinal inflammation and associated immune activation in schizophrenia. *Schizophrenia research* **138**, 48-53 (2012).
45. Severance, E.G., *et al.* Subunit and whole molecule specificity of the anti-bovine casein immune response in recent onset psychosis and schizophrenia. *Schizophrenia research* **118**, 240-247 (2010).
46. Almeida, A., *et al.* A new genomic blueprint of the human gut microbiota. *Nature* **568**, 499-504 (2019).
47. Qin, J., *et al.* A metagenome-wide association study of gut microbiota in type 2 diabetes. *Nature* **490**, 55-60 (2012).
48. Andoh, A., *et al.* Comparison of the gut microbial community between obese and lean peoples using 16S gene sequencing in a Japanese population. *J Clin Biochem Nutr* **59**, 65-70 (2016).
49. Yassour, M., *et al.* Sub-clinical detection of gut microbial biomarkers of obesity and type 2 diabetes. *Genome Med* **8**, 17 (2016).
50. Jie, Z., *et al.* The gut microbiome in atherosclerotic cardiovascular disease. *Nat Commun* **8**, 845 (2017).
51. Fernandez-Egea, E., *et al.* Metabolic profile of antipsychotic-naïve individuals with non-affective psychosis. *Br J Psychiatry* **194**, 434-438 (2009).
52. Kirkpatrick, B., Miller, B.J., Garcia-Rizo, C., Fernandez-Egea, E. & Bernardo, M. Is abnormal glucose tolerance in antipsychotic-naïve patients with nonaffective psychosis confounded by poor health habits? *Schizophrenia bulletin* **38**, 280-284 (2012).
53. Dixon, L., *et al.* Prevalence and correlates of diabetes in national schizophrenia samples. *Schizophrenia bulletin* **26**, 903-912 (2000).
54. Fernandez-Egea, E., Garcia-Rizo, C., Zimbron, J. & Kirkpatrick, B. Diabetes or prediabetes in newly diagnosed patients with nonaffective psychosis? A historical and contemporary view. *Schizophrenia bulletin* **39**, 266-267 (2013).
55. Ravelli, A.C., *et al.* Glucose tolerance in adults after prenatal exposure to famine. *Lancet* **351**, 173-177 (1998).
56. Susser, E., *et al.* Schizophrenia after prenatal famine. Further evidence. *Arch Gen Psychiatry*

607                    **53**, 25-31 (1996).

608        57.        Wahlbeck, K., Forsen, T., Osmond, C., Barker, D.J. & Eriksson, J.G. Association of schizophrenia  
609                    with low maternal body mass index, small size at birth, and thinness during childhood. *Arch*  
610                    *Gen Psychiatry* **58**, 48-52 (2001).

611        58.        Osmond, C. & Barker, D.J. Fetal, infant, and childhood growth are predictors of coronary heart  
612                    disease, diabetes, and hypertension in adult men and women. *Environ Health Perspect* **108**  
613                    **Suppl 3**, 545-553 (2000).

614        59.        Kunugi, H., Nanko, S. & Murray, R.M. Obstetric complications and schizophrenia: prenatal  
615                    underdevelopment and subsequent neurodevelopmental impairment. *Br J Psychiatry Suppl*  
616                    **40**, s25-29 (2001).

617        60.        Ozanne, S.E., Fernandez-Twinn, D. & Hales, C.N. Fetal growth and adult diseases. *Semin*  
618                    *Perinatol* **28**, 81-87 (2004).

619        61.        Ozanne, S.E. & Hales, C.N. Early programming of glucose-insulin metabolism. *Trends*  
620                    *Endocrinol Metab* **13**, 368-373 (2002).

621        62.        Storch Jakobsen, A., *et al.* Associations between clinical and psychosocial factors and  
622                    metabolic and cardiovascular risk factors in overweight patients with schizophrenia spectrum  
623                    disorders - Baseline and two-years findings from the CHANGE trial. *Schizophrenia research*  
624                    **199**, 96-102 (2018).

625        63.        Schmitt, A., *et al.* Effects of Aerobic Exercise on Metabolic Syndrome, Cardiorespiratory  
626                    Fitness, and Symptoms in Schizophrenia Include Decreased Mortality. *Front Psychiatry* **9**, 690  
627                    (2018).

628        64.        Spangaro, M., Mazza, E., Poletti, S., Cavallaro, R. & Benedetti, F. Obesity influences white  
629                    matter integrity in schizophrenia. *Psychoneuroendocrinology* **97**, 135-142 (2018).

630        65.        Chiappelli, J., *et al.* Tryptophan Metabolism and White Matter Integrity in Schizophrenia.  
631                    *Neuropsychopharmacology* **41**, 2587-2595 (2016).

632        66.        Wang, A.K. & Miller, B.J. Meta-analysis of Cerebrospinal Fluid Cytokine and Tryptophan  
633                    Catabolite Alterations in Psychiatric Patients: Comparisons Between Schizophrenia, Bipolar  
634                    Disorder, and Depression. *Schizophrenia bulletin* (2017).

635        67.        Zhu, F., *et al.* Transplantation of microbiota from drug-free patients with schizophrenia causes  
636                    schizophrenia-like abnormal behaviors and dysregulated kynurenine metabolism in mice.  
637                    *Molecular psychiatry* (2019).

638

639



### Healthy controls-enriched mOTUs

### Schizophrenic patients-enriched mOTUs

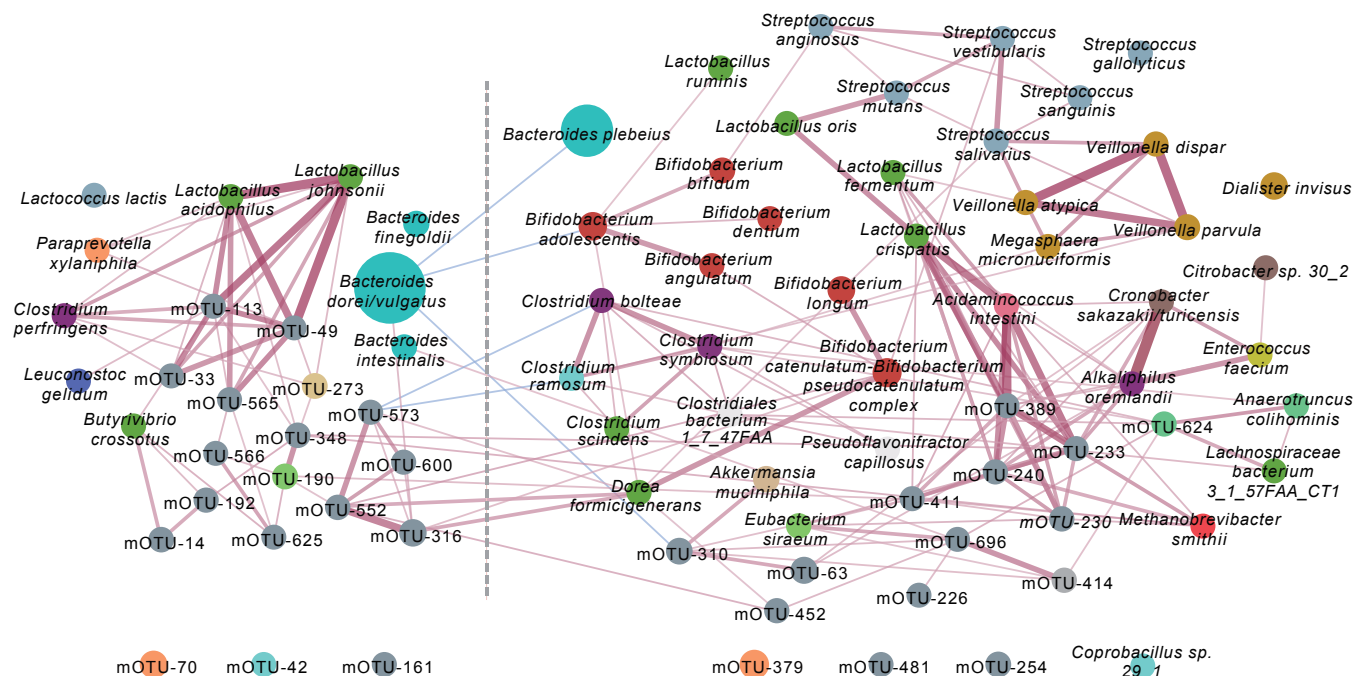

Spearman correlation  
coefficient (cc)

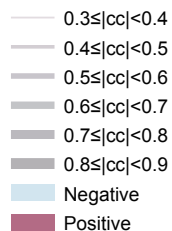

*Actinobacteria*

 *Bifidobacteriaceae*

*Bacteroidetes*

● *Bacteroidaceae*

- *Prevotellaceae*

● *Rikenellaceae*

*Euryarchaeota*

● *Methanobacteriaceae*

*Firmicutes*

● *Eubacteriaceae*

● *Lactobacillaceae*

● *Leuconostocaceae*

- *Streptococcaceae*

● *Veillonellaceae*

● *Enterococcaceae*

● *Erysipelotrichaceae*

*Clostridiaceae*

*Ruminococcaceae*

*Acidaminococcaceae*

*Verrucomicrobia*

● *Verrucomicrobiaceae*

### Proteobacteria

● *Enterobacteriaceae*

● Sutterellaceae

Unclassified

- Unclassified family

Unclassified//FOUO



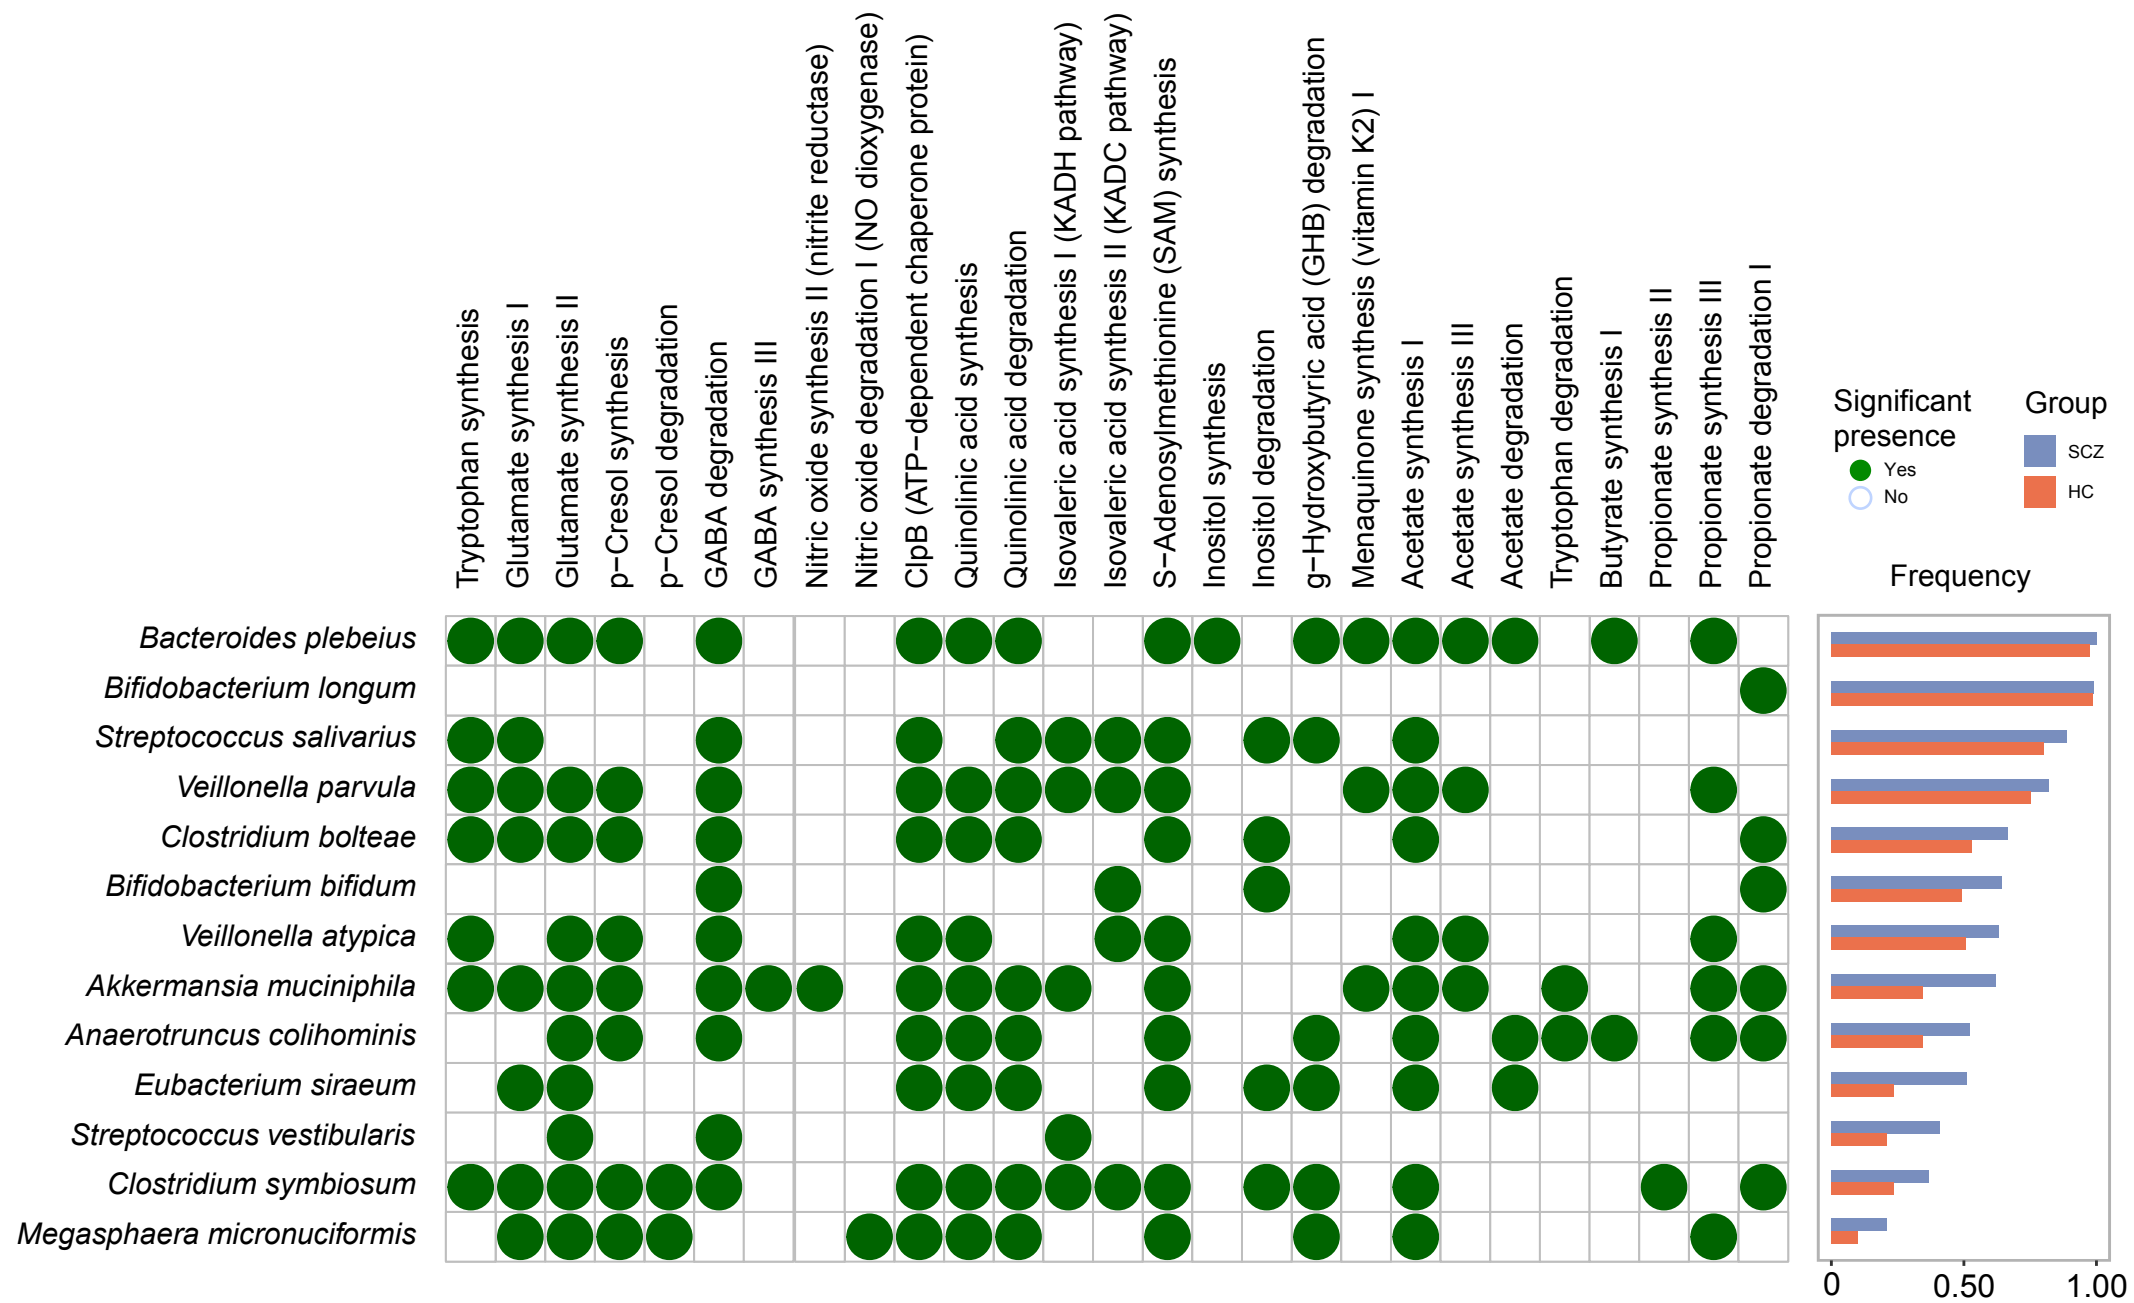

a

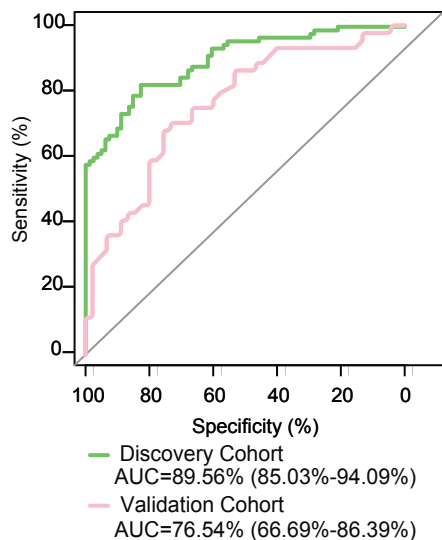

b

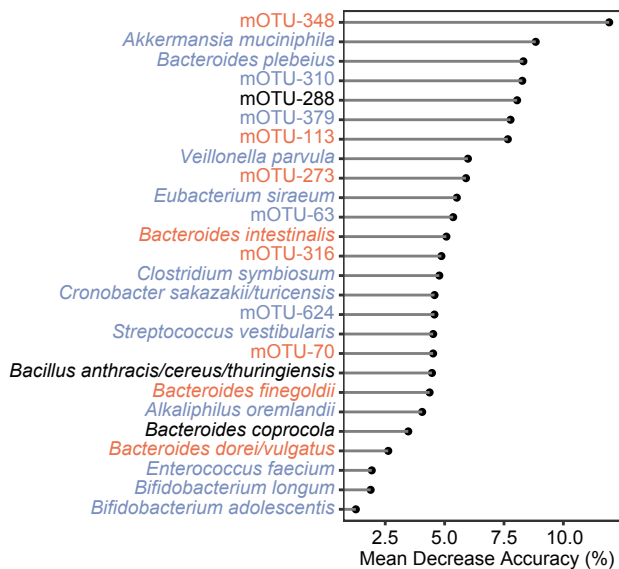

c

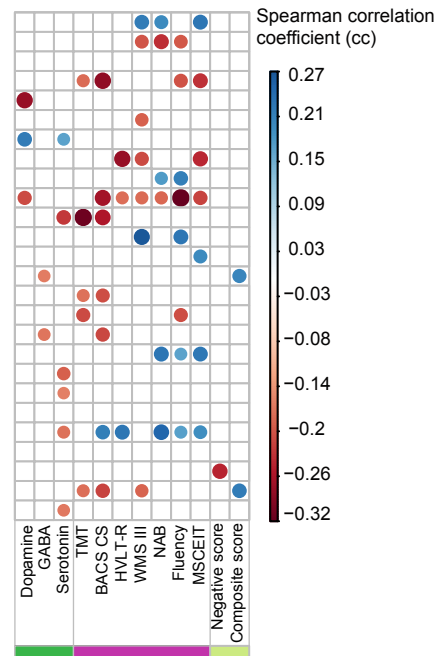

d

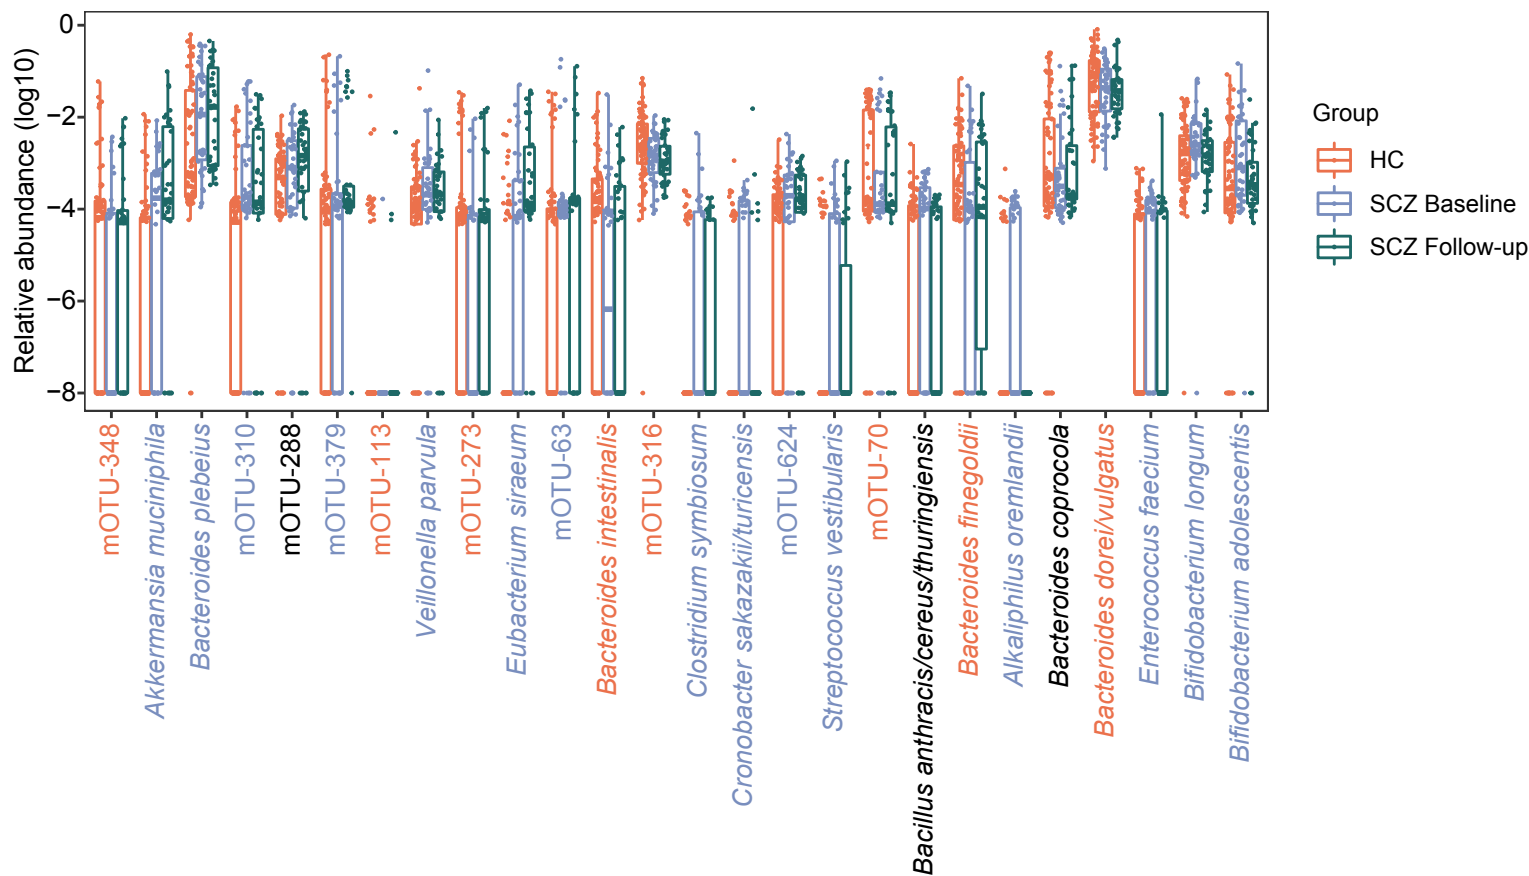

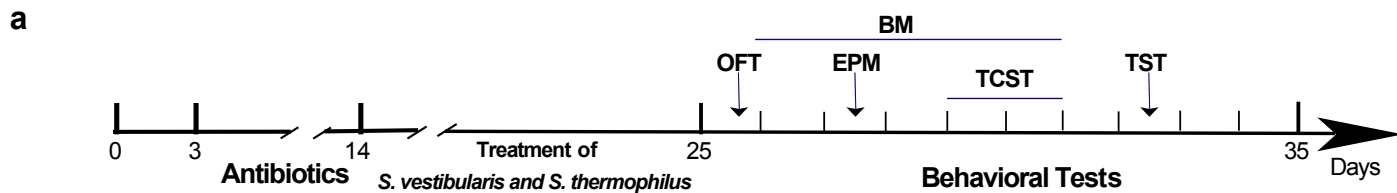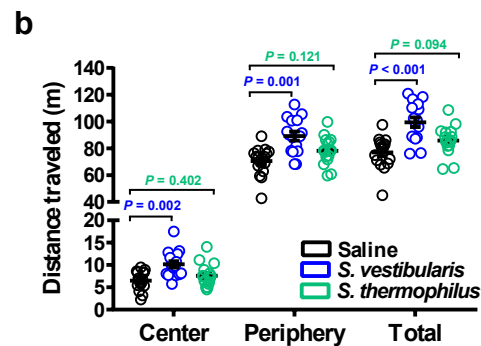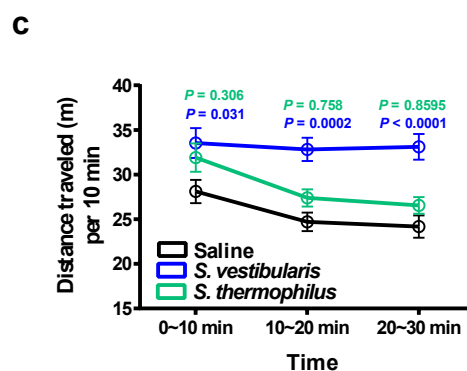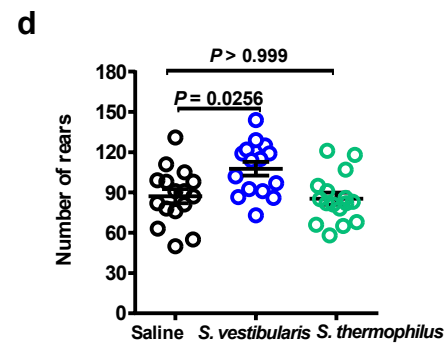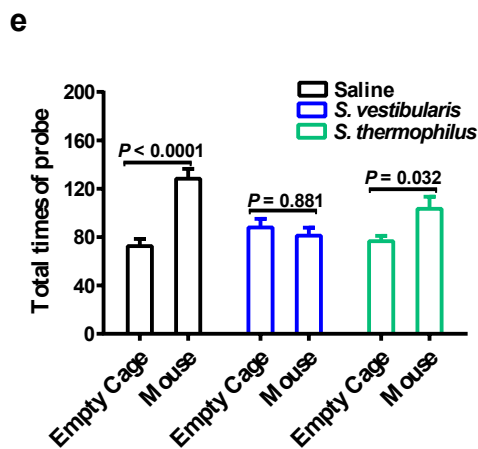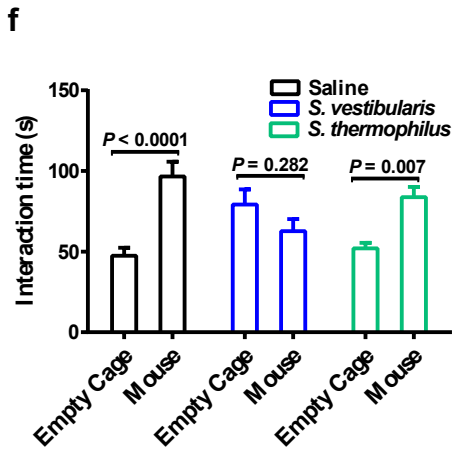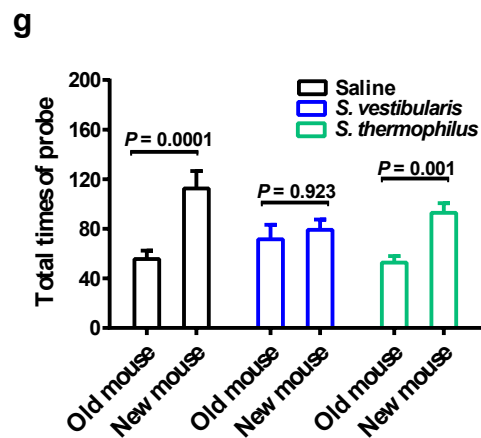

Source: https://www.biorxiv.org/content/biorxiv/early/2019/09/19/774265.full.pdf
